# Supplementary material for: In situ green synthesis of copper(ii) oxide (CuO) and maleic anhydride grafted polypropylene (PP-MAH) for highly efficient nanocatalysis in tannery wastewater treatment
Source: Royal Society of Chemistry journal article supplement (doi:10.1039/d3ew00795b), 2023-11-14
Supplement: d3ew00795b1.pdf [file d3ew00795b1.pdf]

**Supplementary information for**

**In Situ Green Synthesis of Copper(II) Oxide (CuO) and Maleic Anhydride  
Grafted Polypropylene (PP-MAH) for Highly Efficient Nanocatalysis in  
Tannery Wastewater Treatment**

Farnam Manavi<sup>1</sup>, Mohammad Reza Allahgoli Ghasri<sup>1\*</sup>, Shervin Ahmadi<sup>2</sup>, Sima Habibi<sup>1</sup>

<sup>1</sup> Department of Chemistry, College of Science, Yadegar-e-Imam Khomeini (RAH) Shahr-e-Rey Branch, Islamic Azad University, Tehran, Iran.

<sup>2</sup> Iran Polymer and Petrochemical Institute (IPPI), PO BOX: 14965-115, Tehran, Iran

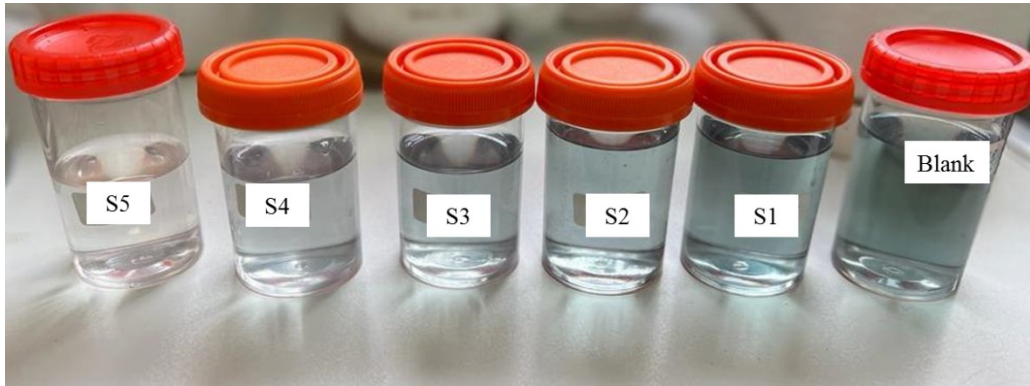

Photos of tannery wastewater samples treated by 0, 5, 10, 15, 20, and 25 g of CuO/PP-MAH nanocomposite during 80 min from Blank to S5.
